# Supplementary material for: Using cluster and rest redistribution set structures as alternatives to resistance training prescription method based on velocity loss thresholds
Source: PeerJ journal article supplement (doi:10.7717/peerj.13195), 2022-03-29

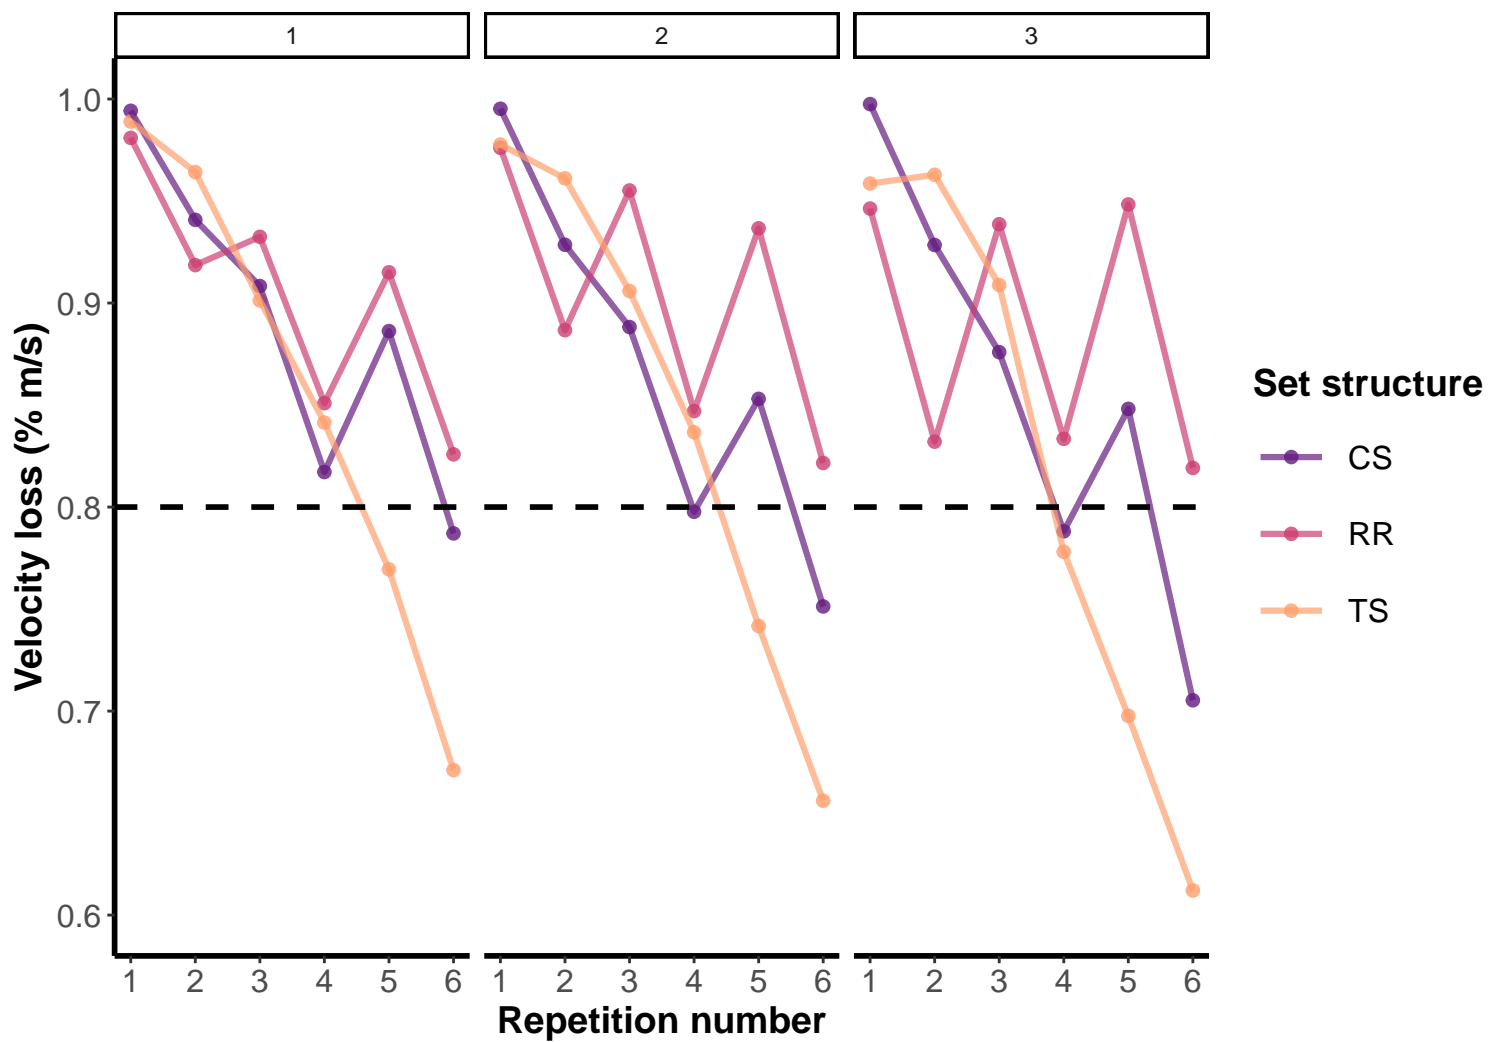

Supplement: supplement_bench.pdf [file supplement_bench.pdf]
